# Supplementary material for: Regional Vulnerability to Demyelination: A Comparative Study of the Effects of LPC, LPS, and Combined Toxins in Corpus Callosum and Spinal Cord
Source: Research Square preprint supplement (doi:10.21203/rs.3.rs-8517400/v1), 2026-02-17
Supplement: Supplementary file 1 [file 3c54b6e66684ee70d4d1fe38.docx]

**Supplementary figure 1**. Represents the myelin score of corpus callosum at different time points obtained by Luxol fast blue staining. For each time points, statistical significance was observed across all the groups but especially by LPC+LPC group compared to Sham group (*p<0.05, **p<0.01, ***p<0.001).

**Supplementary figure 2**. Represents the myelin score of spinal cord at different time points obtained by Luxol fast blue staining. For each time points, statistical significance was observed in all the toxin groups compared to Sham group (*p<0.05, **p<0.01, ***p<0.001). However LPC+LPS group showed significant impair in myelin damage even in dpi-28 when compared to Sham group.
